# Supplementary material for: Genetic Characteristic and RNA-Seq Analysis in Transparent Mutant of Carp–Goldfish Nucleocytoplasmic Hybrid
Source: MDPI journal article supplement (doi:10.3390/genes10090704), 2019-09-12
Supplement: s1 [file s1]

**Table S1.** Primer sequences

| Gene Bank      | Gene Name      | Primer (5'→3')                                      | Product size(bp) |
|----------------|----------------|-----------------------------------------------------|------------------|
| AJ870982       | <i>Gapdh</i>   | AGGGGCTCAGTATGTTGTGG<br>AGGAGGCATTGCTGACAACT        | 185              |
| M24113.1       | <i>β-actin</i> | GATGGACTCTGGTGATGGTGTGAC<br>TTTCTCTTTCGGCTGTGGTGGTG | 168              |
| XM_019106987.1 | <i>PNP5a</i>   | AGGATTGCCAGGACACAGC<br>TTGGACGGGATAACCCTCATAG       | 260              |
| XM_019071116.1 | <i>GIMAP8</i>  | ACACGATACTGAGAAGAGAAGC<br>CGCCATTGAGACGCACTT        | 188              |
| XM_019069292.1 | <i>PNP4a</i>   | GGACTTGCTGGACTGAAC<br>ACGCCTTCTTGACATAC             | 155              |
| XM_019088725.1 | <i>EDNRB</i>   | CATCAGTTGGCATCACAGT<br>GAGAGTGTAGAAGATAGCAGTA       | 338              |
| XM_019098377.1 | <i>URGCP</i>   | AGCGAGGAGCGTTAAGTGT<br>TATCAGTGTTTGAAGCAGGAG        | 215              |
| XM_019113351.1 | <i>AKAP12</i>  | ACCTGAAGTAAGTGATGCTGTC<br>ACTAATTGAATGGCTTGCTCTG    | 201              |
| XM_019070058.1 | <i>GBP1</i>    | GCTTGGCTTCTGCTGACATT<br>ATGCTGCTAAGATGTTGGTGTT      | 334              |
| XM_019123301.1 | <i>GNA14</i>   | GTTGCTTTAGTTTGTTGCTGGT<br>GTGCCTTGTTGCCTTCCTC       | 203              |
| XM_019097578.1 | <i>GSLN</i>    | TTTCTTTCTGCTCTTTGCTCTG<br>GGTGTACTCCTCATAACTGTGT    | 229              |
| XM_019092492.1 | <i>HRG</i>     | AGCACCATCACCACCAGTA<br>GGAGGAAGGACATTGACCAT         | 184              |
| XM_019116640.1 | <i>APBP2</i>   | TCGGATTCTTCTCGTTCTCATT<br>GCACACAAATACACACCACTC     | 247              |

---

**Table S2.** Statistic of mRNA data

| <b>Sample</b> | <b>Clean Reads<br/>Number</b> | <b>Reads Length</b> | <b>Clean Q30 Bases Rate (%)</b> | <b>Mapped reads</b> | <b>Mapping rate (%)</b> |
|---------------|-------------------------------|---------------------|---------------------------------|---------------------|-------------------------|
| TRCC          | 63,272,006                    | 145                 | 96.59%                          | 41,800,444          | 66.06%                  |
| RRCC          | 75,019,864                    | 145                 | 96.71%                          | 50,183,848          | 66.89%                  |

**Table S3.** Statistic of miRNA data.

| Sample                    | TRCC     | RRCC     |
|---------------------------|----------|----------|
| Total Raw Reads           | 10979661 | 12296112 |
| Total Clean Reads         | 9876199  | 11368562 |
| Unique Clean Reads        | 522171   | 496650   |
| Total Match Reads         | 9655021  | 11263543 |
| Perfect Match Reads       | 7898353  | 9385680  |
| Total Clean Reads Mature  | 6197464  | 7565200  |
| Unique Clean Reads Mature | 2578     | 2525     |
| Total Clean Reads Novel   | 552776   | 725490   |
| Unique Clean Reads Novel  | 2712     | 2978     |

**Table S4.** DE miRNAs in TM compared to WT

| Known<br>miRNA | Fold<br>change | P-adjust | Regulation | miRNA            | Fold<br>change | P-adjust | Regulation |
|----------------|----------------|----------|------------|------------------|----------------|----------|------------|
| ccr-miR-153b   | 18.03          | 1.00E-05 | up         | ccr-miR-146<br>a | 2.01           | 0.00E+00 | up         |
| Novel miRNA    | Fold<br>change | P-adjust | Regulation | miRNA            | Fold<br>change | P-adjust | Regulation |
| Novel_410      | 1383.38        | 3.27E-94 | up         | Novel_244        | 920.59         | 9.68E-90 | down       |
| Novel_435      | 1241.90        | 7.97E-87 | up         | Novel_84         | 890.06         | 1.84E-87 | down       |
| Novel_87       | 1029.68        | 3.26E-75 | up         | Novel_411        | 862.58         | 2.18E-85 | down       |
| Novel_341      | 655.01         | 7.51E-53 | up         | Novel_88         | 851.89         | 1.40E-84 | down       |
| Novel_137      | 586.89         | 1.85E-48 | up         | Novel_104        | 777.09         | 1.02E-78 | down       |
| Novel_380      | 356.33         | 1.63E-32 | up         | Novel_7          | 567.93         | 1.94E-61 | down       |
| Novel_392      | 272.48         | 3.52E-26 | up         | Novel_188        | 389.31         | 2.39E-45 | down       |
| Novel_224      | 196.50         | 4.53E-20 | up         | Novel_293        | 311.45         | 8.71E-38 | down       |
| Novel_266      | 170.30         | 7.55E-18 | up         | Novel_393        | 216.79         | 5.02E-28 | down       |
| Novel_155      | 154.58         | 1.72E-16 | up         | Novel_415        | 174.04         | 2.15E-23 | down       |
| Novel_346      | 128.38         | 3.84E-14 | up         | Novel_62         | 109.92         | 6.87E-16 | down       |
| Novel_174      | 120.52         | 1.95E-13 | up         | Novel_428        | 94.65          | 5.39E-14 | down       |
| Novel_427      | 86.46          | 3.25E-10 | up         | Novel_223        | 87.02          | 4.88E-13 | down       |
| Novel_23       | 70.74          | 1.17E-08 | up         | Novel_395        | 61.07          | 1.20E-09 | down       |
| Novel_460      | 62.88          | 6.90E-08 | up         | Novel_268        | 56.49          | 5.07E-09 | down       |
| Novel_459      | 60.26          | 1.25E-07 | up         | Novel_70         | 54.96          | 8.15E-09 | down       |
| Novel_75       | 49.78          | 1.55E-06 | up         | Novel_288        | 53.43          | 1.29E-08 | down       |
| Novel_50       | 47.16          | 2.91E-06 | up         | Novel_300        | 50.38          | 3.25E-08 | down       |
| Novel_157      | 44.54          | 5.53E-06 | up         | Novel_190        | 48.85          | 5.27E-08 | down       |
| Novel_129      | 41.92          | 1.01E-05 | up         | Novel_391        | 47.33          | 8.37E-08 | down       |
| Novel_136      | 41.92          | 1.01E-05 | up         | Novel_145        | 45.80          | 1.35E-07 | down       |
| Novel_273      | 39.30          | 1.87E-05 | up         | Novel_234        | 41.22          | 6.03E-07 | down       |
| Novel_184      | 39.30          | 1.87E-05 | up         | Novel_315        | 36.64          | 2.66E-06 | down       |
| Novel_119      | 34.06          | 6.62E-05 | up         | Novel_49         | 33.59          | 7.03E-06 | down       |
| Novel_160      | 34.06          | 6.62E-05 | up         | Novel_24         | 33.59          | 7.03E-06 | down       |
| Novel_314      | 34.06          | 6.62E-05 | up         | Novel_74         | 33.59          | 7.03E-06 | down       |
| Novel_16       | 31.44          | 1.22E-04 | up         | Novel_161        | 30.53          | 1.87E-05 | down       |
| Novel_202      | 31.44          | 1.22E-04 | up         | Novel_291        | 29.01          | 2.94E-05 | down       |
| Novel_313      | 31.44          | 1.22E-04 | up         | Novel_290        | 29.01          | 2.94E-05 | down       |
| Novel_73       | 31.44          | 1.22E-04 | up         | Novel_130        | 29.01          | 2.94E-05 | down       |

**Table S5.** All the DE genes between TM and WT

(Due to the large amount of data, all the differentially regulated genes have been shown in the attached [Supplemental Table 5.](#))
