# Supplementary figures and images for: Genetic Characteristic and RNA-Seq Analysis in Transparent Mutant of Carp–Goldfish Nucleocytoplasmic Hybrid
Source: MDPI journal article supplement (doi:10.3390/genes10090704), 2019-09-12

## Supplemental Fig. 1

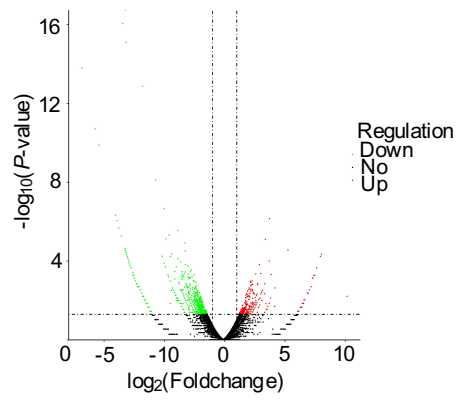

(A)

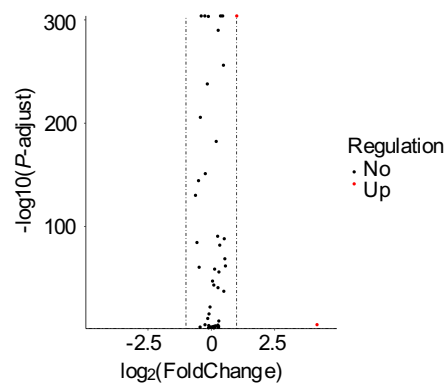

(B)

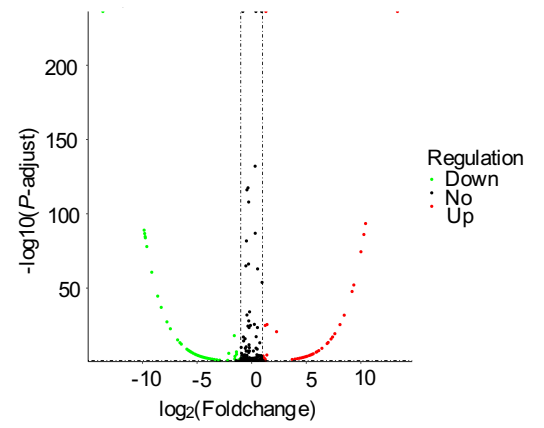

(C)

## Supplemental Fig. 2

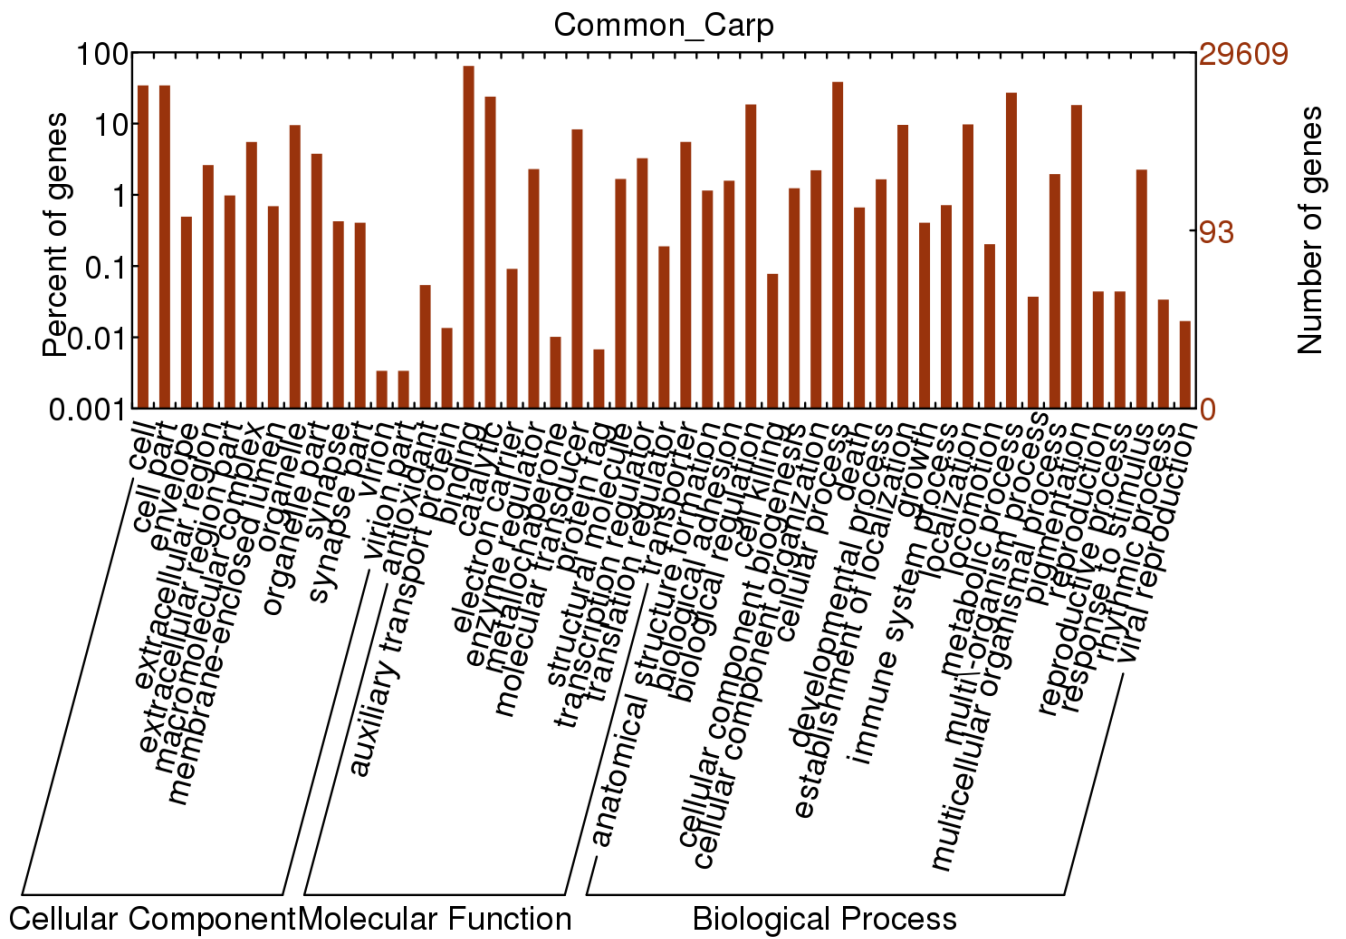

Supplement: s1 [file s1]
